# Supplementary material for: Geminin cooperates with Polycomb to restrain multi-lineage commitment in the early embryo
Source: Oxford University Press journal article supplement (doi:10.1242/dev.059824), 2010-11-24
Supplement: dev059824figs1.pdf [file dev059824figs1.pdf]

**A**

anti-phosphorylated histone H3

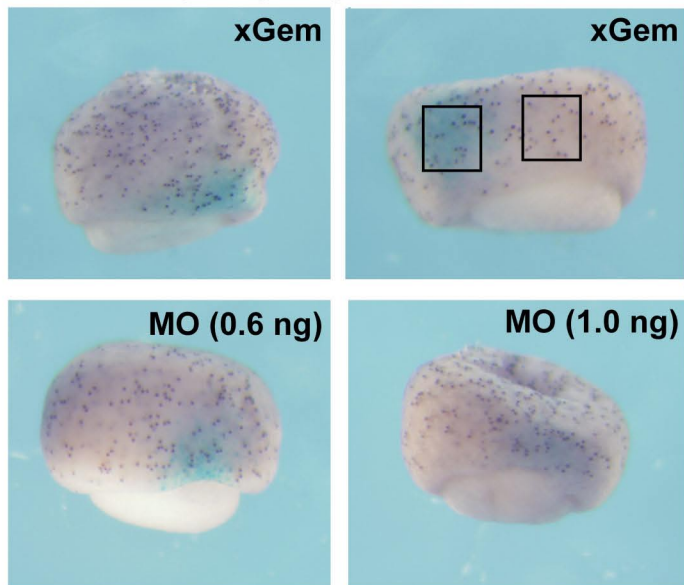**B**

anti-phosphorylated histone H3

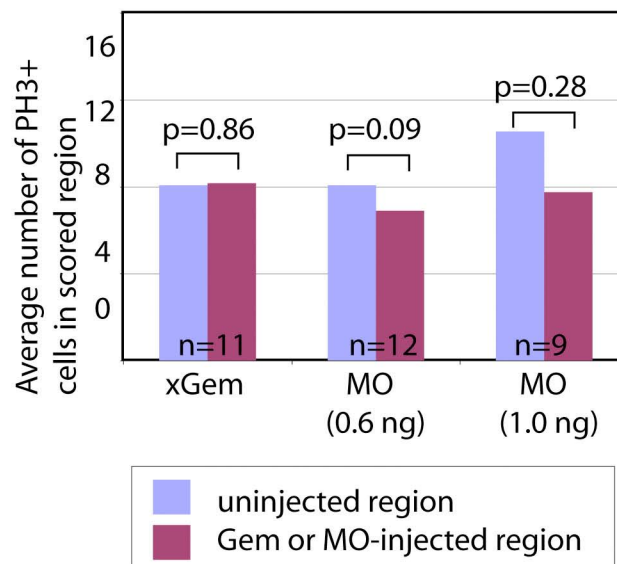**C**

TUNEL

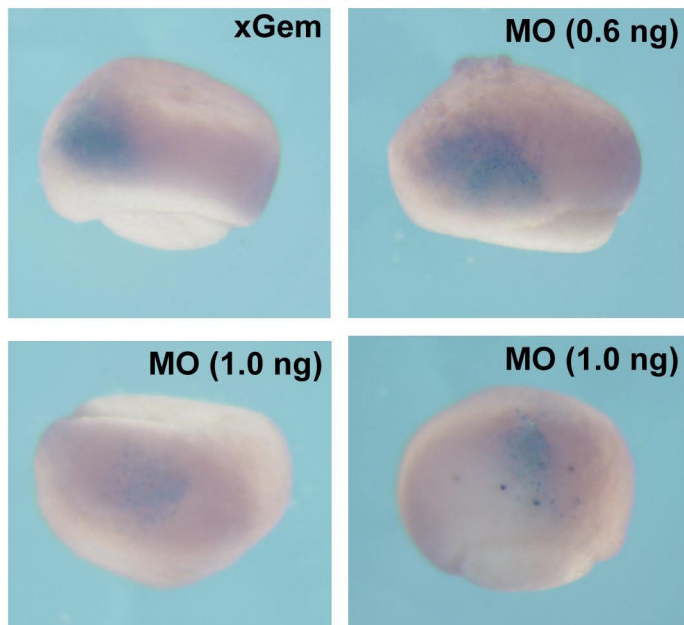**D**

| Sample          | total TUNEL + cells | number of embryos scored | Average TUNEL + cells/embryo |
|-----------------|---------------------|--------------------------|------------------------------|
| xGem            | 2                   | 14                       | 0.14                         |
| xGemMO (0.6 ng) | 6                   | 15                       | 0.40                         |
| xGemMO (1.0 ng) | 9                   | 10                       | 0.90                         |
