# Supplementary material for: Geminin cooperates with Polycomb to restrain multi-lineage commitment in the early embryo
Source: Oxford University Press journal article supplement (doi:10.1242/dev.059824), 2010-11-24

## A Gene expression changes in embryos resulting from Gem over-expression or MO knockdown

| Sample | Marker     | Loss of expression |     | No Change |    | Increased and/or ectopic expression |    | # of embryos |
|--------|------------|--------------------|-----|-----------|----|-------------------------------------|----|--------------|
|        |            | #                  | %   | #         | %  | #                                   | %  |              |
| xGem   | Xpo        | 41                 | 98  | 1         | 2  | 0                                   | 0  | 42           |
| GemMO  | Xpo        | 0                  | 0   | 6         | 13 | 40                                  | 87 | 46           |
| xGem   | Mix.2      | 38                 | 90  | 4         | 10 | 0                                   | 0  | 42           |
| GemMO  | Mix.2      | 1                  | 5   | 5         | 25 | 14                                  | 70 | 20           |
| xGem   | Brachyury  | 45                 | 85  | 8         | 15 | 0                                   | 0  | 53           |
| GemMO  | Brachyury  | 38                 | 88  | 5         | 12 | 0                                   | 0  | 43           |
| xGem   | Endodermin | 36                 | 86  | 6         | 14 | 0                                   | 0  | 42           |
| GemMO  | Endodermin | 7                  | 14  | 7         | 14 | 36                                  | 72 | 50           |
| xGem   | Sox17      | 29                 | 81  | 7         | 19 | 0                                   | 0  | 36           |
| GemMO  | Sox17      | 0                  | 0   | 8         | 23 | 27                                  | 77 | 35           |
| xGem   | xHex       | 21                 | 100 | 0         | 0  | 0                                   | 0  | 21           |

## B Gene expression changes in embryos resulting from Gem MO knockdown, dose curve

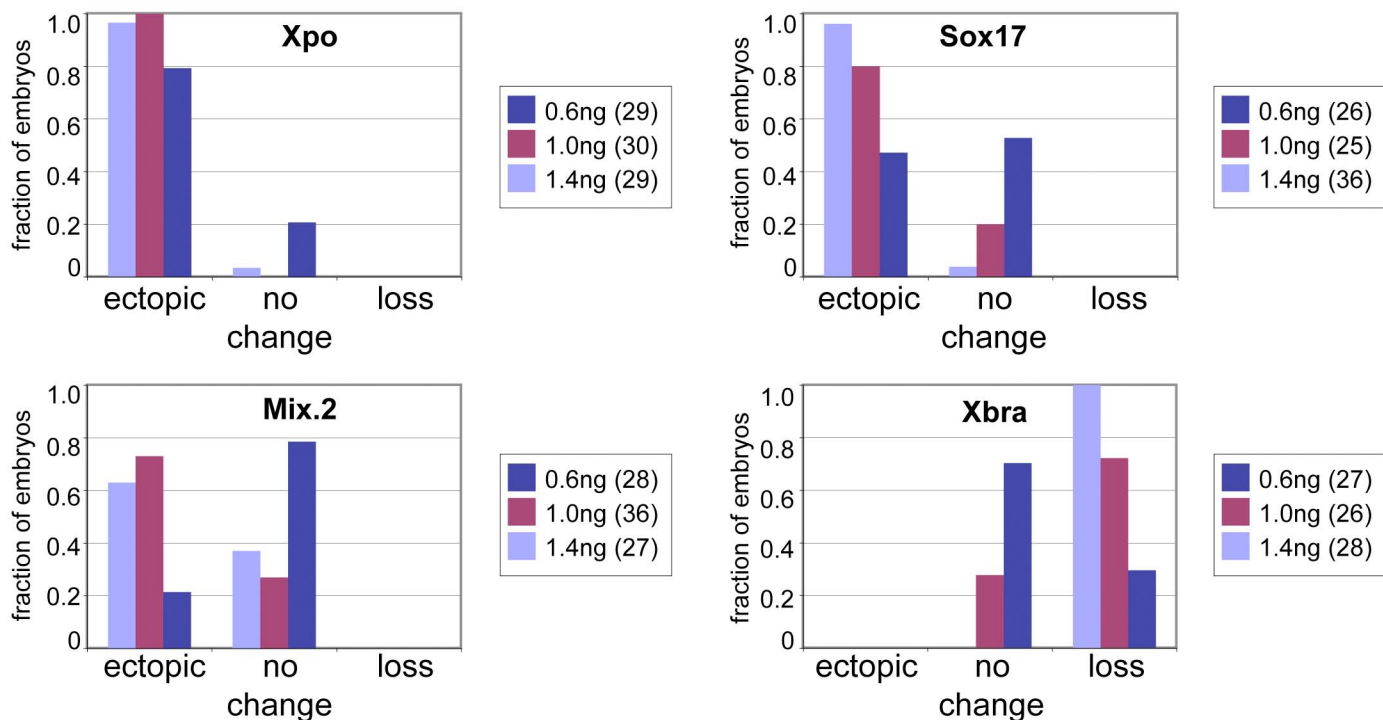

## C Gene expression changes in embryos resulting from Gem MO knockdown, time course

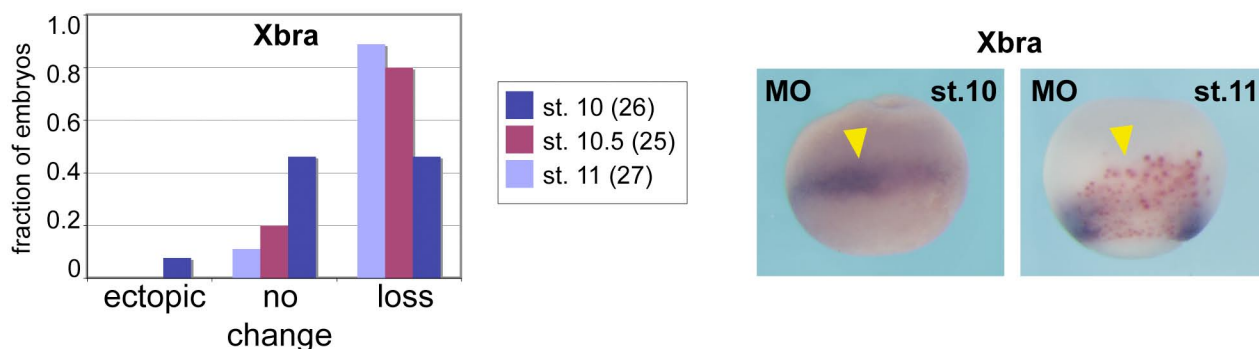

Supplement: dev059824figs2.pdf [file dev059824figs2.pdf]
