# Supplementary material for: Geminin cooperates with Polycomb to restrain multi-lineage commitment in the early embryo
Source: Oxford University Press journal article supplement (doi:10.1242/dev.059824), 2010-11-24
Supplement: dev059824tables1.pdf [file dev059824tables1.pdf]

Table S1. Primers used

| A Quantitative RT-PCR |              |                         |
|-----------------------|--------------|-------------------------|
| Gene                  | Primer name  | Sequence                |
| Ascl1/Xash1           | Fxash1qRT    | CCCCAACTATTCCCACGATA    |
| Ascl1/Xash1           | Rxash1qRT    | TGCTACTCCGCATCTCAGAA    |
| Bambi                 | F xBambi     | AAAAGCTGCTGCCTGACCTGT   |
| Bambi                 | R xBambi     | CTGTACATCCCCCAATGGAC    |
| Bmp4                  | xBmp4 F      | ACCCATAGCTGCAAATGGAC    |
| Bmp4                  | xBmp4 R      | CATGCTTCCCCTGATGAGTT    |
| Bmp7                  | xBmp7 F      | TGAGTTCTTTCCGCACA       |
| Bmp7                  | xBmp7 R      | CAGTCTTCTCCAGCATTATT    |
| Brachyury             | Xbra F       | AGCTCACCAACGAGATGATCG   |
| Brachyury             | Xbra R       | AACCGTATACATTGCATTGGGAT |
| Brat                  | xBrat F      | GAGAACTGCTGTCGGGAAT     |
| Brat                  | xBrat R      | GGCAGGTAGAGGGAGTCTTG    |
| Btg1                  | xBtg1 F      | GCCAACATGAAGCCAGAGA     |
| Btg1                  | xBtg1 R      | TTATAGTGATCGGCCAGCAT    |
| Ccnd1                 | xCcnd1 F     | TGATCTCCTTCTGGCAACAT    |
| Ccnd1                 | xCcnd1 R     | GTGTCCACTTCGAGCATAG     |
| Chd                   | Fx Chd3      | ATGCCTATGGGCTCTTTCCT    |
| Chd                   | Rx Chd3      | CCAAGCAAATCCTTCTCTCG    |
| Cxcr4                 | Fx Cxcr4     | ACTGCATTTGGGAGAACACC    |
| Cxcr4                 | Rx Cxcr4     | CTGAGGTGAATGCGTTCTGA    |
| Dlx3                  | Fx Dlx3      | GGTTCAGCGAAATGTTCCAT    |
| Dlx3                  | Rx Dlx3      | ATGGAGTGGCACTGGATTTC    |
| Dlx5                  | F xDlx5      | GCGCTGAATGCGTATCAGTA    |
| Dlx5                  | R xDlx5      | AGGGCTCCCATAGCCATAGT    |
| Dlx6                  | F xDlx6      | ATCCGGTTTAAATGGGAAAGG   |
| Dlx6                  | R xDlx6      | AGTGCCAGGTAAGGGTTTG     |
| Dullard               | xDullard F   | CTGGAGCTTCGTCTCTACC     |
| Dullard               | xDullard R   | TTCCGTTTCACTGACTGAG     |
| Dusp1                 | xDusp1 F     | GGTCGTTCTTCTCTTCAGC     |
| Dusp1                 | xDusp1 R     | CACCTCTGCTCCTCATTGG     |
| Ef1a                  | xEf1a F      | CACCATGAAGCCCTACTGA     |
| Ef1a                  | xEf1a R      | ACCTGTGCGGTAAGAAACC     |
| Efna1                 | Fx Efna1     | TGAGTGGAGTGTTGGAGCTG    |
| Efna1                 | Rx Efna1     | ACCGTGAATCCTCTGCAC      |
| Elf1                  | xElf1 F      | CGCCTGAAAGCAAACAGAC     |
| Elf1                  | xElf1 R      | GGAGAAGGAAACCCGTTAGG    |
| Epiker                | FxEpiKerqRT  | CACCAGAACACAGAGTAC      |
| Epiker                | RxEpiKerqRT  | CAACCTTCCCATCAACCA      |
| Etv5/Xer81            | xER81/ETV5 F | CGAGCCGTGCAATTCTTT      |
| Etv5/Xer81            | xER81/ETV5 R | CCTTGTGGAGGAAACTGAATG   |
| Foxd5a                | xFoxD5a F    | CCAATCTGTGACCCTCCACT    |
| Foxd5a                | xFoxD5a R    | CTTCCCGGACAACCTTGTA     |
| Foxi1                 | F xFoxi1     | TCCTCAGCGACCTTCAAAC     |
| Foxi1                 | R xFoxi1     | TCCTGGCAGATATGGAGGAG    |
| Fzd10                 | Fx Fzd10b    | GACGCAAGACAAGTGCAAAA    |
| Fzd10                 | Rx Fzd10b    | CTGCTGGGATAGAGCTGGTC    |
| Fzd7                  | Fx Fzd7      | AAACACACCTTGTGCCTTCC    |
| Fzd7                  | Rx Fzd7      | GGCCCATTTAAAGCAAAACA    |
| Gadd45a               | xGadd45a F   | AGTCAGCAAGCGAAGAACAC    |
| Gadd45a               | xGadd45a R   | AGGTTGCACTCCTCTGCAC     |
| Gnb1                  | Fx Gnb1      | GCCGGTTTCTTGATGACAAT    |
| Gnb1                  | Rx Gnb1      | GTCTTCTGCTGTCCCGTCTC    |
| Goosecoid             | xGoosecoid F | TTCACCGATGAACAACCTGGA   |
| Goosecoid             | xGoosecoid R | TTCCACTTTTGGGCATTTTC    |
| Gos2                  | Fx G0S2      | CCGATATGGAAACCATCCAC    |
| Gos2                  | Rx G0S2      | AATGACCACTCCGAACAAGG    |
| GPR143                | Fx Gpr143    | TCCAATGCAAGGCTTCTCT     |
| GPR143                | Rx Gpr143    | CCATTGTGTGACGCTTCAGT    |
| Grhl1                 | xGrhl1 F     | AAGACGGTGCCTTTAACAT     |
| Grhl1                 | xGrhl1 R     | CTCTGGGATTCGGTTTTGAT    |
| Grhl3                 | xGrhl3 F     | GGCACGAGACCTCAGTTTTAC   |
| Grhl3                 | xGrhl3 R     | CAATCATCTGTGACCCTCCTC   |
| Hist2h2aa             | xHist2h2aa F | GCCAGGGACAACAAGAAACT    |
| Hist2h2aa             | xHist2h2aa R | CAGCAGAGCAGATTGGATGT    |
| Id2                   | xId2 F       | GCATCGTCAGTCTCCATCAT    |

|              |             |                            |
|--------------|-------------|----------------------------|
| Id2          | xld2 R      | GGATTTGCTCTCGTCTGTGA       |
| Id3          | Fx Id3      | GTTATTTGCCACCCCATCTG       |
| Id3          | Rx Id3      | TTACTAGCCAAGCCCCACAC       |
| Kitlg        | Fx Kitlg    | CTTGTACCATGCCTGCAGAA       |
| Kitlg        | Rx Kitlg    | GACCTGGCAGAGGAATCAAA       |
| Klf2         | F xKlf2     | GCTGGTTGTGGGAAGACCTA       |
| Klf2         | R xKlf2     | GTTTCATCAGATCGGGCAAAT      |
| Ldb1         | Fx ldb1     | TTGGAGGATGGACCAAAGAG       |
| Ldb1         | Rx ldb1     | CTTGGGGTGCTTCAAGACAT       |
| Lhx5         | Fx Lhx5     | GTGCAACCTGACCGAAAAAT       |
| Lhx5         | Rx Lhx5     | CTCGCTTTCCTGACCAAGTC       |
| Lmo4         | xLMO4 F     | TCATCCCAGCTTCTTCTTT        |
| Lmo4         | xLMO4 R     | GATCAACTCGGCGCTATTCT       |
| Map2k7       | xMap2k7-A F | GAGCAGAAACTCTCCCGTCT       |
| Map2k7       | xMap2k7-A R | GAATGTCCATCATTGGCAAG       |
| MGC81002     | Fx MGC81002 | GAACGTGGAGACCTCAGAGC       |
| MGC81002     | Rx MGC81002 | AAGAAACGAGGCCACTGAGA       |
| Mix.2        | Fx Mix.2    | GAA GGA CTT CCA GCA GCA TC |
| Mix.2        | Rx Mix.2    | GCG TCT TTG GGT CTG ACA TT |
| Mos          | Fx mosxe    | TGGGGCAATTCATACCAAGT       |
| Mos          | Rx mosxe    | GGCCATTACACTTCTGAT         |
| Msx1         | FxMsx1qRT   | TTATGCAACTGCCAGAGGAG       |
| Msx1         | RxMsx1qRT   | GGGCTTTCTGTTGGTTTTGT       |
| Msx2         | xMsx2 F     | TCATTTAGGGATCAGGGACAGC     |
| Msx2         | xMsx2 R     | TGGTGCCATCTTCGGAGTTTTT     |
| Myo10        | xMyo10 F    | GTGAAGAAGCGTTGCAGTGT       |
| Myo10        | xMyo10 R    | CTCGATGAAGGATGATGACG       |
| Oct1/Pou2f1  | xOct-1 F    | AACTACCTCAGCAAAGCCAAG      |
| Oct1/Pou2f1  | xOct-1 R    | GTACAGGGGTGGCAGCTATT       |
| Oct25/Pou5f1 | xOct-25 F   | CCTTCACCTTTTGTTTTTA        |
| Oct25/Pou5f1 | xOct-25 R   | TTTTTGGGTTTGGGAATG         |
| Oct60/Pou5f1 | xOct-60 F   | ACTACAATGCCCGTCCTACCC      |
| Oct60/Pou5f1 | xOct-60 R   | ACTCCCCGGCGTTTTCTCCT       |
| Oct91/Pou5f1 | xOCT-91 F   | ATGAAGGGCAGTTATGGTA        |
| Oct91/Pou5f1 | xOCT-91 R   | CAGTGGGGGTGGTGCTCA         |
| Otx1         | Fx Otx1     | CTTGGTACAGCCCTGGGATA       |
| Otx1         | Rx Otx1     | GCCAGAAGCTACACGAGTCC       |
| Pax6         | Fx Pax6     | CCAATCAGCCTAGGATTCCA       |
| Pax6         | Rx Pax6     | CGCTAAGATCCTGTGTGCAA       |
| Pcgf2        | xPcgf2 F    | CCTGCAAGAGGTTGAGGTTT       |
| Pcgf2        | xPcgf2 R    | CTGGGGAGAGAGGATGATGT       |
| Per1         | xPer1-A F   | GGGCTTCTTCTCTCTCTCT        |
| Per1         | xPer1-A R   | GAACTTGGGCTGGTGTCTCT       |
| Rab27A       | Fx Rab27a   | TCCGATGGGGATTACGATTA       |
| Rab27A       | Rx Rab27a   | TCAATGCCCACTGTTGTGAT       |
| Sall1        | F xSall1    | TGAACAAATCCGTACCAAA        |
| Sall1        | R xSall1    | GGGACAAATGGGAACCTAGA       |
| Sizzled/Szl  | xSzl F      | GGCAGAACCTCCTACAAACC       |
| Sizzled/Szl  | xSzl R      | GAACGTGTCCAGGCAGACT        |
| Smad7        | Fx Smad7    | GGCGACTTTAGAGCGACATC       |
| Smad7        | Rx Smad7    | TAGCAACAGCATCAGCATCC       |
| Sox11        | xSox11 F    | GGCAGAAGGCACATCATAC        |
| Sox11        | xSox11 R    | CATTAGGAAAACAGGCCAAAAG     |
| Sox2         | Xsox2 F     | CCAGTCCACCTGTAGTCACCTCT    |
| Sox2         | Xsox2 R     | CACTTCTGCCCAAGGTAGGTAC     |
| Sox7         | F xSox7     | CAGAGAGCCTGGACTGTTCC       |
| Sox7         | R xSox7     | GTCTTCGGATACGGGTCTCA       |
| Suv39h1      | xSuv39h1 F  | GCAACAATCTCCTGAAGCAA       |
| Suv39h1      | xSuv39h1 R  | TAGTGGGAAAGGCTCTGGTC       |
| Szl          | xSzl F      | GGCAGAACCTCCTACAAACC       |
| Szl          | xSzl R      | GAACGTGTCCAGGCAGACT        |
| Tbx3         | F xTbx3     | GATCCCAGAGTCTCCATCCA       |
| Tbx3         | R xTbx3     | CTGACACAGCCAGGAGTTCA       |
| Tbx6/Brat    | xBrat       | GAGAAACTGGTGTGGGAAT        |
| Tbx6/Brat    | xBrat       | GGCAGGTAGAGGGAGTCTTG       |
| Tead1        | Fx Tead1    | CGTTTCTTTACCGAATCCA        |
| Tead1        | Rx Tead1    | GTGTCCCGTTTGTAAACCAC       |
| Tiarin       | xTiarin F   | GGAACCTGGCAAACATGGAG       |
| Tiarin       | xTiarin R   | TGCAGAGGAGCTACCCAAT        |
| Tmem45b      | xTmem45b    | AGTGGGACCAGACTGACCAC       |

|            |              |                        |
|------------|--------------|------------------------|
| Tmem45b    | xTmem45b     | TGCCAGACAACCTTCTGTGC   |
| Vdac1      | Fx Vdac1     | TGGTGTCCGCAACATAGAA    |
| Vdac1      | Rx Vdac1     | TGGGTGTTTGCATACCAGA    |
| Vent1      | xVent1 F     | TGGTTCAACAGGGATTCTTC   |
| Vent1      | xVent1 R     | CTGCTAAGGAAGGATTTGC    |
| Vent2      | FxVent2qRT   | GCTACACAGGGACACAACCTC  |
| Vent2      | RxVent2qRT   | GCCTGAGTCAGTGCTAGTGC   |
| Xer81/Etv5 | XER81/ETV5 F | CGAGCCGTGCAATTCTTT     |
| Xer81/Etv5 | XER81/ETV5 R | CCTTGTGGAGGAAACTGAATG  |
| Xhel       | F xXhel      | CACATTCTGTGGACCCCTCT   |
| Xhel       | R xXhel      | AGCCGTTCTTCTGCACTGAT   |
| Xpo        | xXpo F       | GTGCAGGAGATCAAAAAGAGAG |
| Xpo        | xXpo R       | CAATGTGAGACCAACTGCTGTA |
| Zic1       | xZic1 F      | TCCGTTACATGAGGCAGCC    |
| Zic1       | xZic1 R      | TTGTTGCACGACTTTTGGG    |
| Zic2       | Fx Zic2      | TCAACAACCCCAAGAAAAGC   |
| Zic2       | Rx Zic2      | ACACTCCTCCAGAAGCAGA    |
| Zic3       | xZic3 F      | CCTGTGTGCACCCTGATATG   |
| Zic3       | xZic3 R      | TACATGAGGCAACCCATCAA   |

#### B Chromatin immunoprecipitation

| Gene      | Primer name | Sequence             |
|-----------|-------------|----------------------|
| Goosecoid | Fx Gsc-1    | CAGGGAGAGTCTGCGATTTT |
| Goosecoid | Rx Gsc-1    | GGATGGGGTGAGAGGAGACT |
| Goosecoid | Fx Gsc-2    | TAATGTCCCATCACGCTCAA |
| Goosecoid | Rx Gsc-2    | AAGCACAGCAGCTCCACTCT |
| Goosecoid | Fx Gsc-3    | AGAGTGGAGCTGCTGTGCTT |
| Goosecoid | Rx Gsc-3    | CGACTTTGTGTGTGCGTCTC |
| Brachyury | Fx Bra-1    | GGGTGACACACCACTTCCTC |
| Brachyury | Rx Bra-1    | GAGCACAGAAACCCAGAGA  |
| Brachyury | Fx Bra-2    | TCTCTGGGGTTTCTGTGCTC |
| Brachyury | Rx Bra-2    | AGGCAGCTCATTGGTCAGTT |
| Brachyury | Fx Bra-3    | CACAGCTTGTCCAGGCCTAT |
| Brachyury | Rx Bra-3    | TGCGATTGATCAGCAGGTAG |

Each primer set was designed using the Primer 3 program and parameters recommended for quantitative PCR (qPCR). Some primer sequences were also analyzed using the NCBI primer-BLAST program to assure that they only recognized the intended gene and not related genes. PCR products were run on a 2% agarose gel and tested by melting curve to ensure that they produced a single product of the expected size.
