# Supplementary material for: Geminin cooperates with Polycomb to restrain multi-lineage commitment in the early embryo
Source: Oxford University Press journal article supplement (doi:10.1242/dev.059824), 2010-11-24
Supplement: dev059824tables2.pdf [file dev059824tables2.pdf]

**Table S2. Confirmation of Geminin down- and upregulated genes from microarrays: expression changes in embryos after Geminin overexpression or morpholino (MO) knockdown****A Effect of Geminin overexpression and knockdown on downregulated genes from microarrays**

| Sample | Marker | Loss of expression |            | No change |            | Increased and/or ectopic expression |            | Number of embryos |
|--------|--------|--------------------|------------|-----------|------------|-------------------------------------|------------|-------------------|
|        |        | Number             | Percentage | Number    | Percentage | Number                              | Percentage |                   |
| xGem   | Sall1  | 38                 | 95         | 2         | 5          | 0                                   | 0          | 40                |
| GemMO  | Sall1  | 6                  | 12         | 6         | 12         | 39                                  | 76         | 51                |
| xGem   | Szl    | 37                 | 100        | 0         | 0          | 0                                   | 0          | 37                |
| GemMO  | Szl    | 0                  | 0          | 5         | 19         | 21                                  | 81         | 26                |
| xGem   | Vent1  | 20                 | 100        | 0         | 0          | 0                                   | 0          | 20                |
| GemMO  | Vent1  | 0                  | 0          | 3         | 13         | 20                                  | 87         | 23                |
| xGem   | Vent2  | 13                 | 87         | 2         | 13         | 0                                   | 0          | 15                |
| GemMO  | Vent2  | 0                  | 0          | 5         | 17         | 24                                  | 83         | 29                |
| xGem   | Zic1   | 37                 | 88         | 5         | 12         | 0                                   | 0          | 42                |
| GemMO  | Zic1   | 0                  | 0          | 10        | 22         | 36                                  | 78         | 46                |
| xGem   | Zic3   | 29                 | 83         | 6         | 17         | 0                                   | 0          | 35                |
| GemMO  | Zic3   | 3                  | 7          | 20        | 48         | 19                                  | 45         | 42                |
| xGem   | Foxi1  | 13                 | 100        | 0         | 0          | 0                                   | 0          | 13                |
| GemMO  | Foxi1  | 0                  | 0          | 0         | 0          | 12                                  | 100        | 12                |
| xGem   | Grhl1  | 21                 | 100        | 0         | 0          | 0                                   | 0          | 21                |
| GemMO  | Grhl1  | 4                  | 14         | 0         | 0          | 24                                  | 86         | 28                |

**B Effect of Geminin overexpression and knockdown on upregulated genes from microarrays**

| Sample | Marker | Loss of expression |            | No change |            | Increased and/or ectopic expression |            | Number of embryos |
|--------|--------|--------------------|------------|-----------|------------|-------------------------------------|------------|-------------------|
|        |        | Number             | Percentage | Number    | Percentage | Number                              | Percentage |                   |
| xGem   | Fzd7   | 15                 | 29         | 7         | 13         | 30                                  | 58         | 52                |
| GemMO  | Fzd7   | 26                 | 49         | 27        | 51         | 0                                   | 0          | 53                |
| xGem   | H1F00  | 0                  | 0          | 20        | 41         | 29                                  | 59         | 49                |
| GemMO  | H1F00  | 19                 | 70         | 7         | 26         | 1                                   | 4          | 27                |
| xGem   | Oct25  | 0                  | 0          | 16        | 20         | 64                                  | 80         | 80                |
| GemMO  | Oct25  | 55                 | 85         | 10        | 15         | 0                                   | 0          | 65                |
| xGem   | Sox2   | 7                  | 27         | 0         | 0          | 19                                  | 73         | 26                |
| GemMO  | Sox2   | 25                 | 66         | 12        | 32         | 1                                   | 3          | 38                |
| xGem   | Sox3   | 4                  | 13         | 0         | 0          | 28                                  | 88         | 32                |
| GemMO  | Sox3   | 18                 | 56         | 13        | 41         | 1                                   | 3          | 32                |
| xGem   | Sox11  | 4                  | 13         | 2         | 6          | 25                                  | 81         | 31                |
| GemMO  | Sox11  | 24                 | 86         | 4         | 14         | 0                                   | 0          | 28                |
| xGem   | Zic2   | 0                  | 0          | 0         | 0          | 53                                  | 100        | 53                |
| GemMO  | Zic2   | 12                 | 26         | 35        | 74         | 0                                   | 0          | 47                |

Geminin $\Delta$ coil mRNA or MO were co-injected with  $\beta$ -galactosidase lineage tracer mRNA. After lineage labeling and in situ hybridization, embryos were selected for scoring only if the lineage-labeled region overlapped the marker gene. For each gene analyzed, numbers represent additive data from two to six experiments.
