# Supplementary figures and images for: Geminin cooperates with Polycomb to restrain multi-lineage commitment in the early embryo
Source: Oxford University Press journal article supplement (doi:10.1242/dev.059824), 2010-11-24

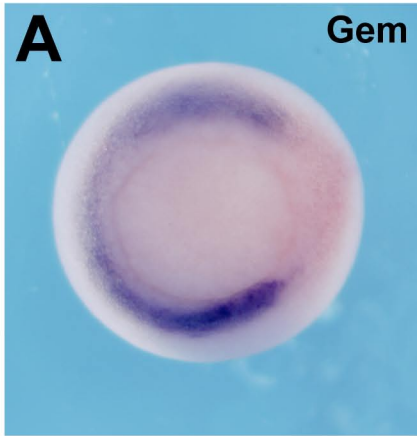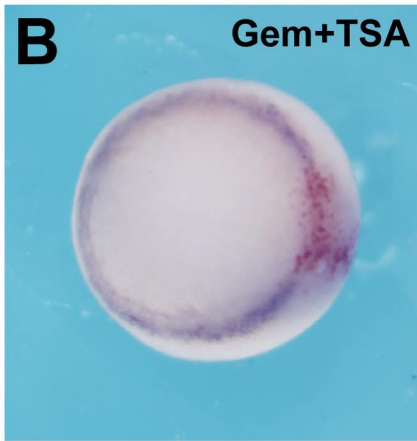

**C**

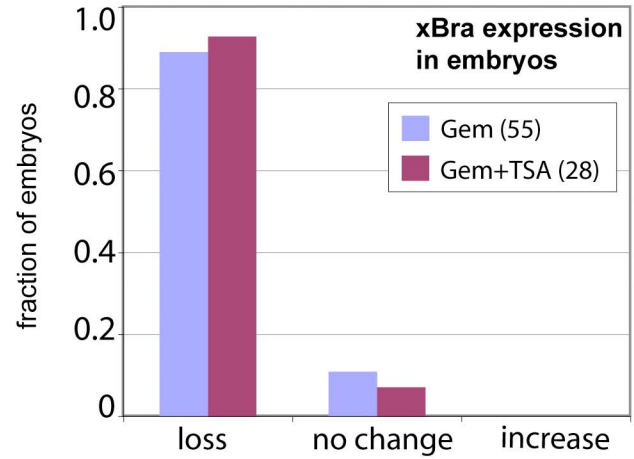

**D**

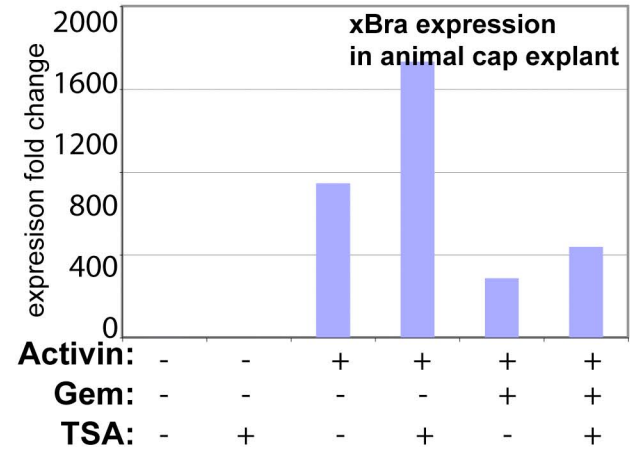

Supplement: dev059824figs10.pdf [file dev059824figs10.pdf]

**A**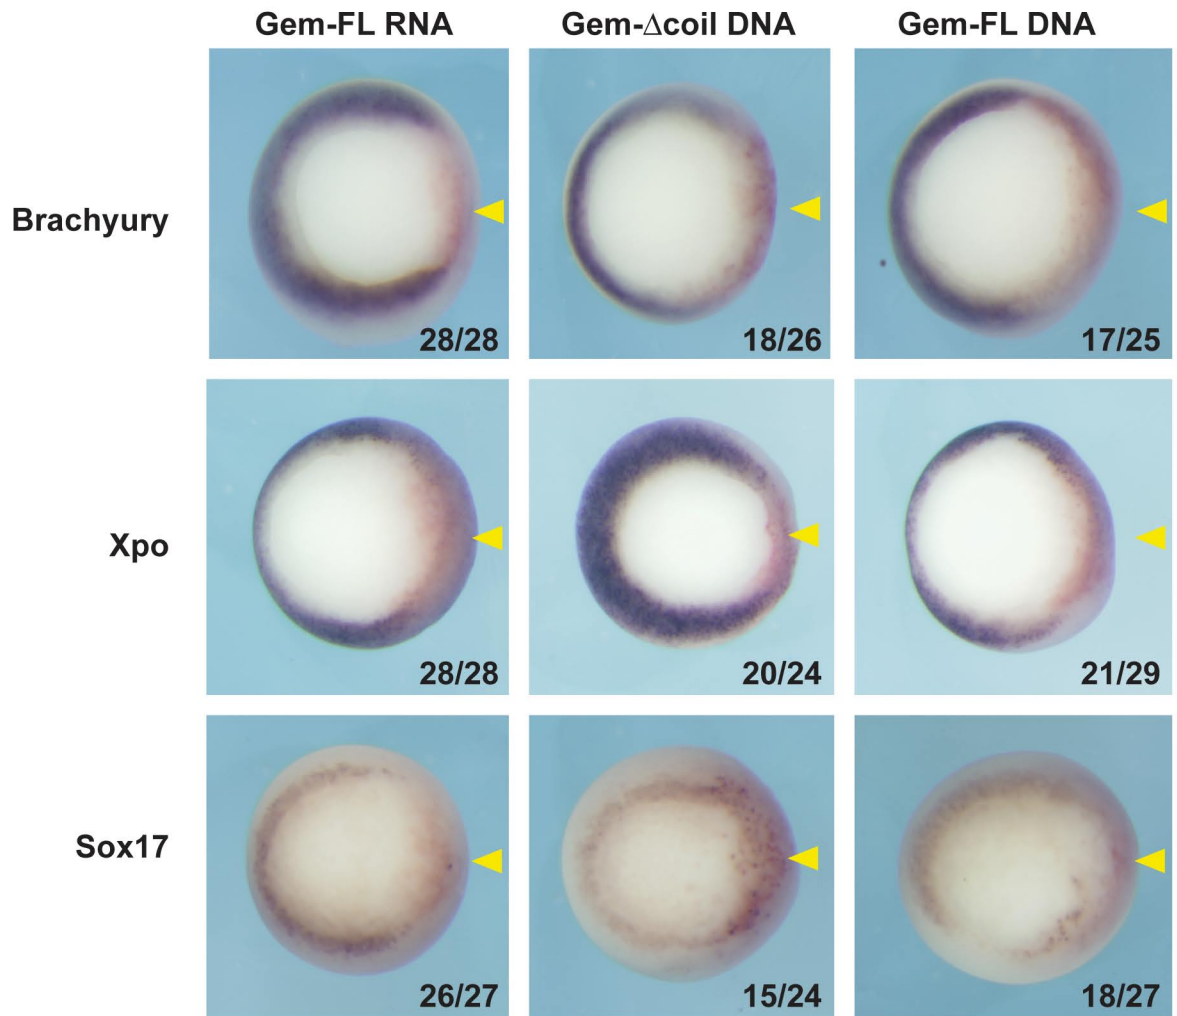**B**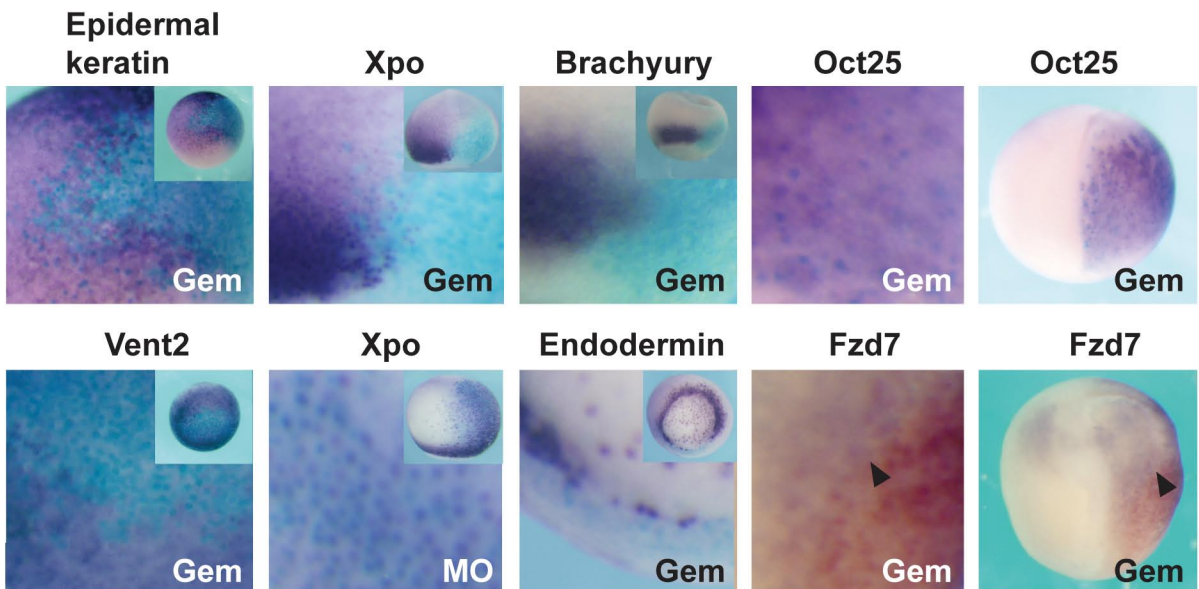

Supplement: dev059824figs3.pdf [file dev059824figs3.pdf]

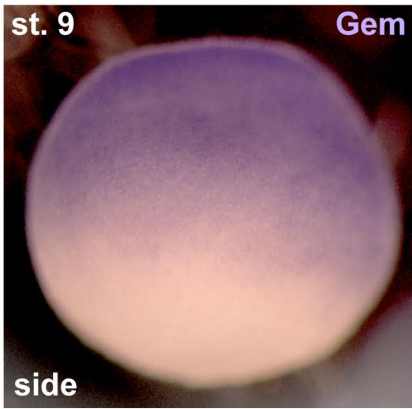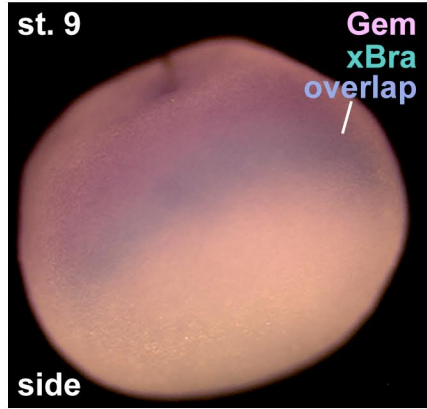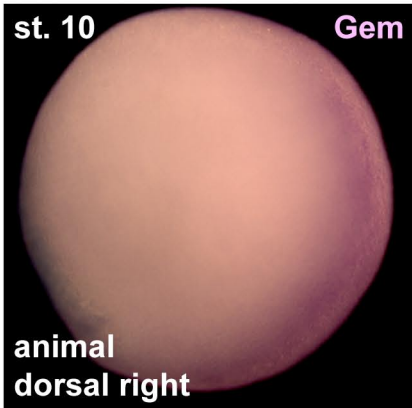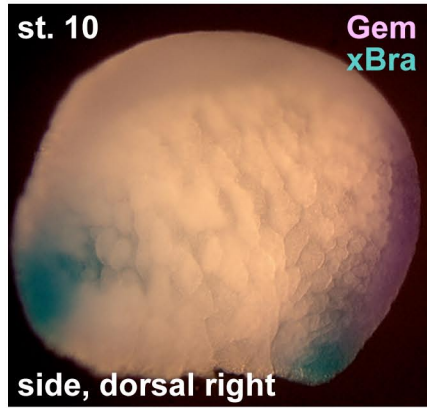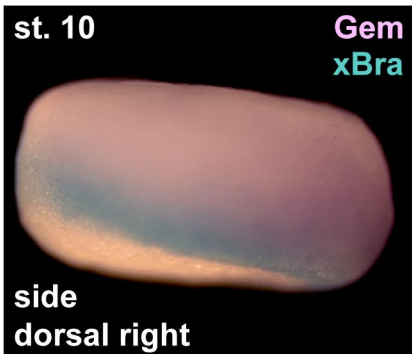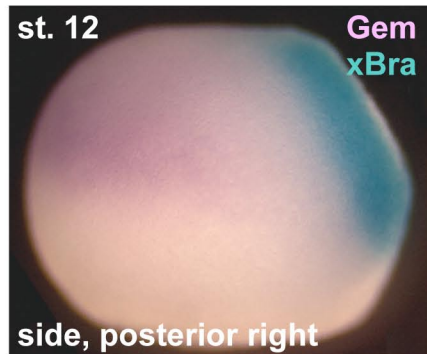

Supplement: dev059824figs4.pdf [file dev059824figs4.pdf]

Fig. S5

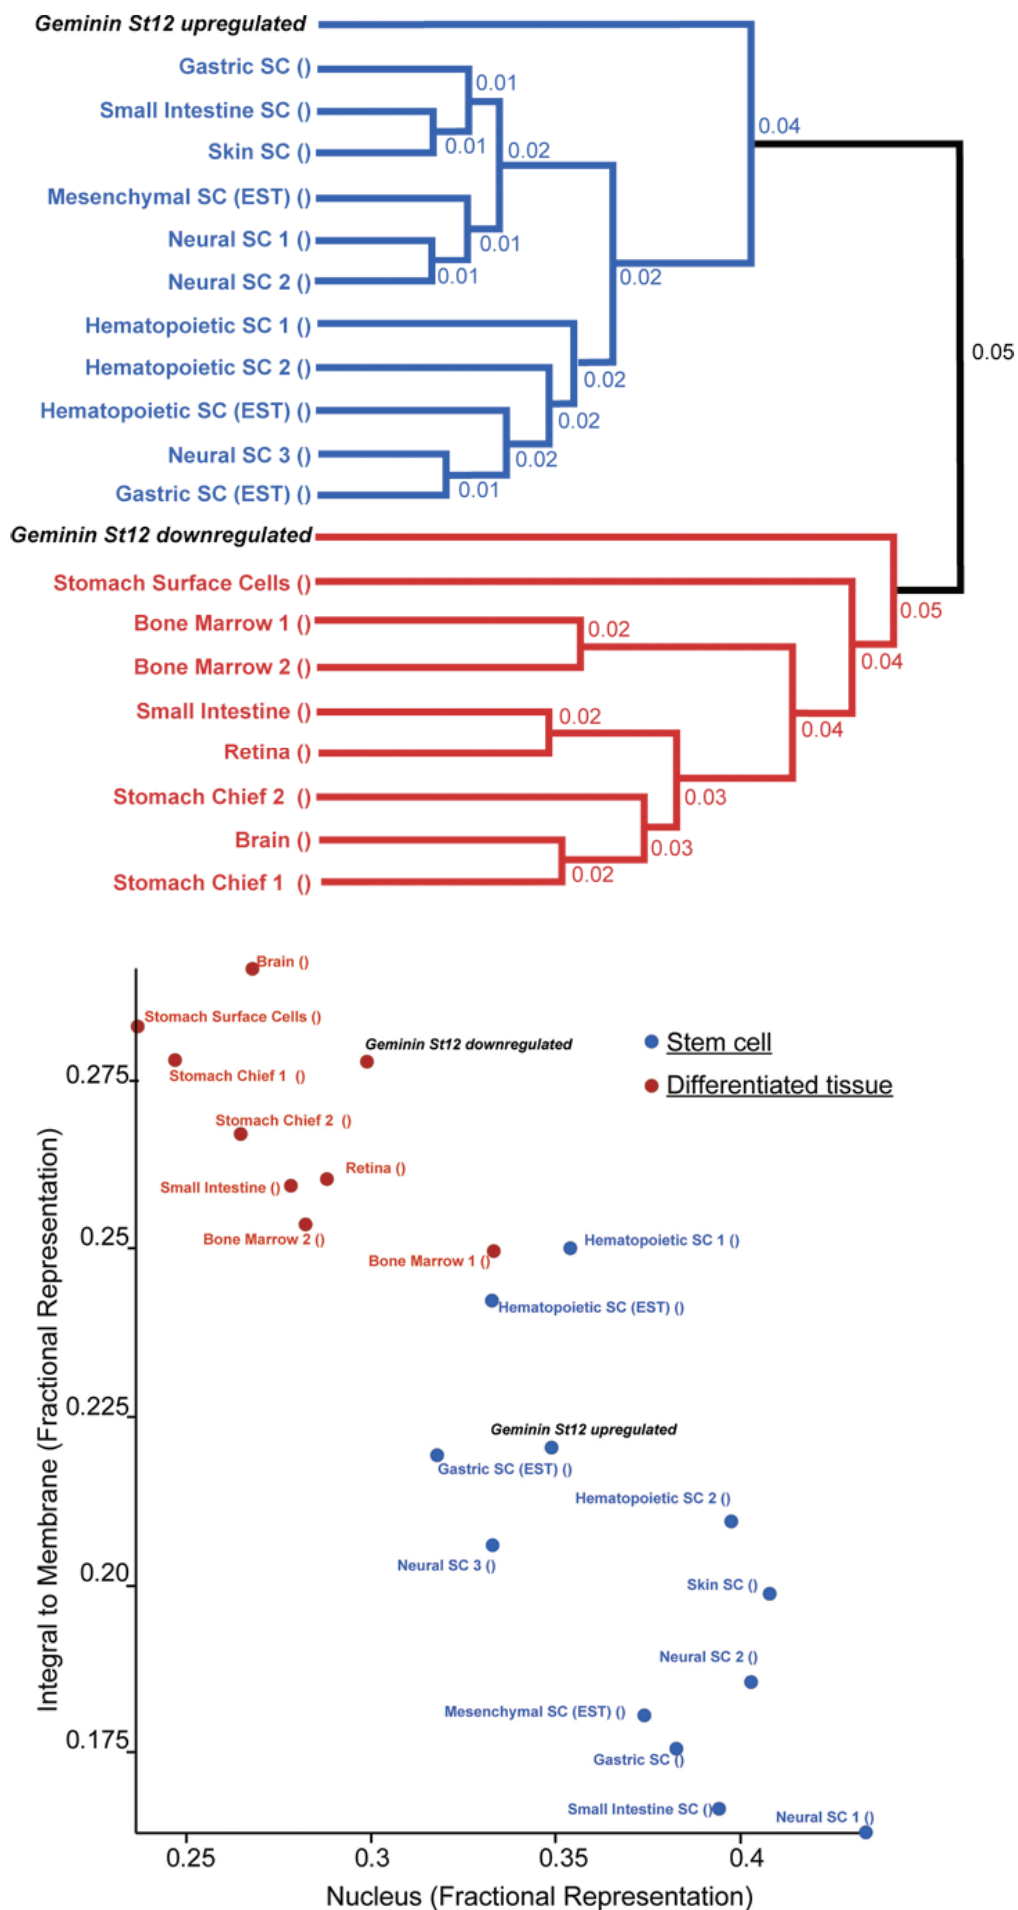

Supplement: dev059824figs5.pdf [file dev059824figs5.pdf]

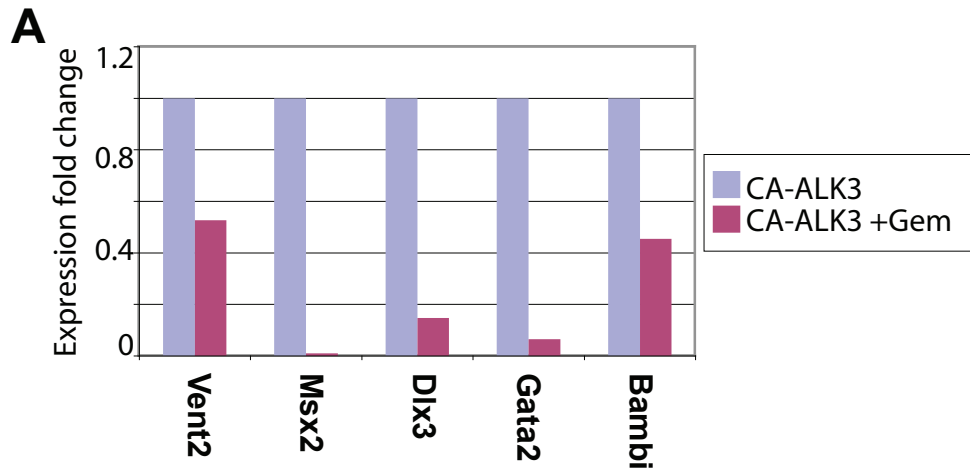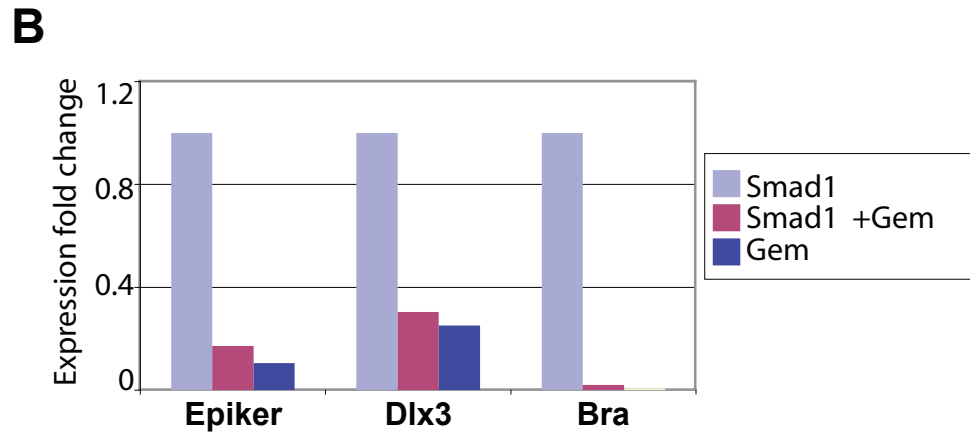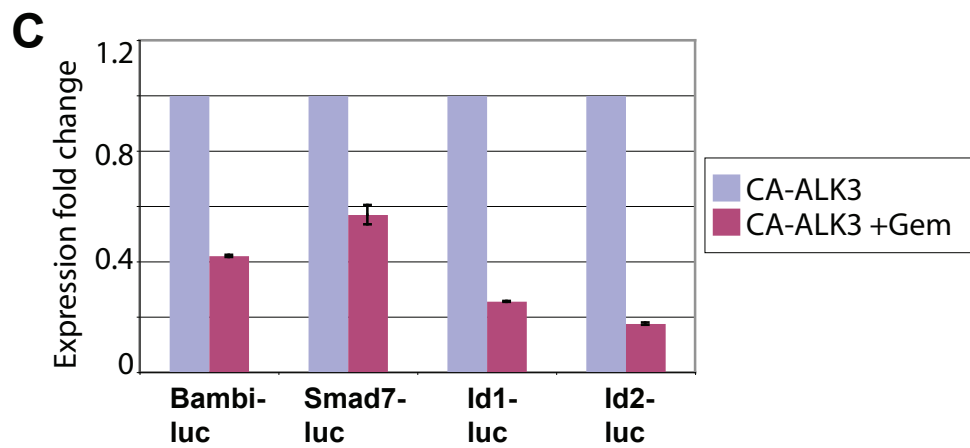

Supplement: dev059824figs6.pdf [file dev059824figs6.pdf]

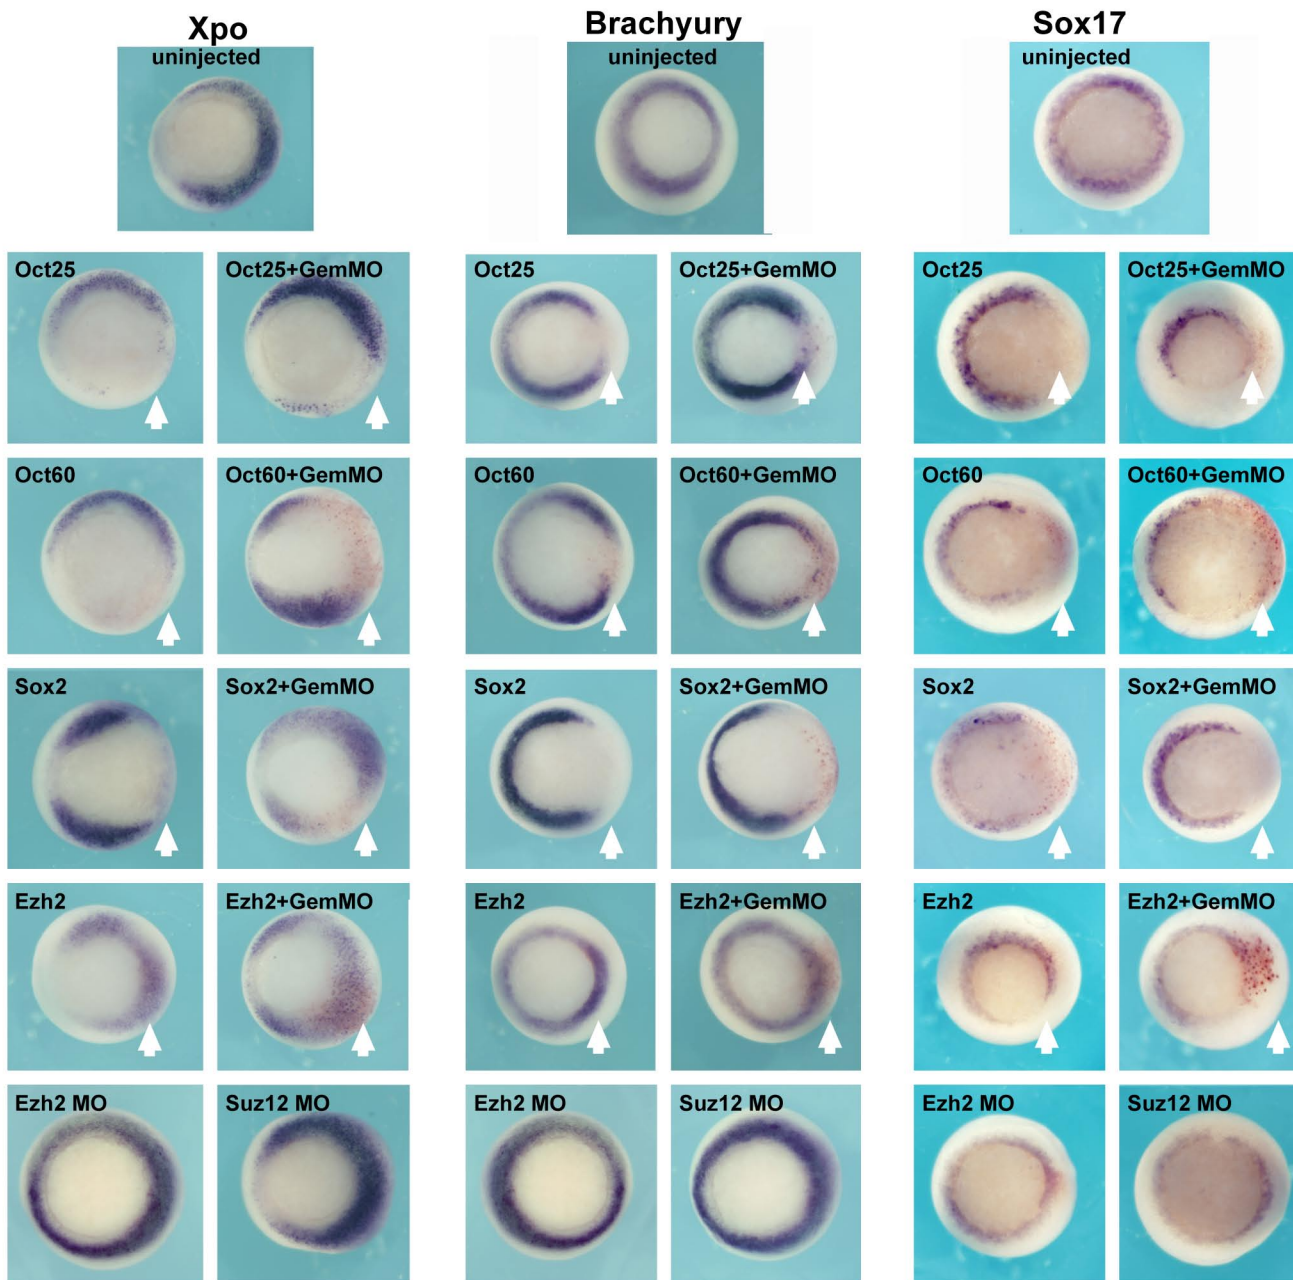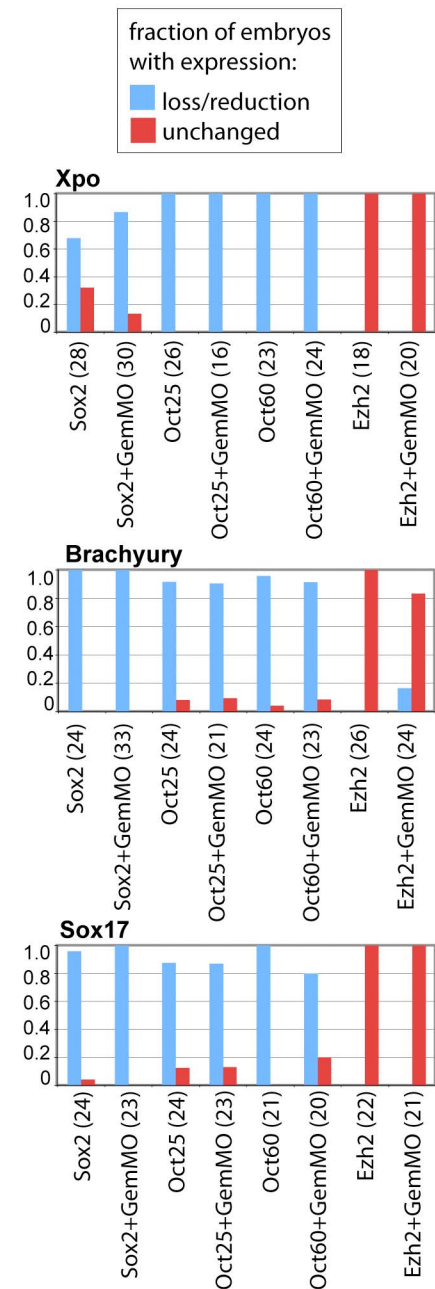

Supplement: dev059824figs7.pdf [file dev059824figs7.pdf]

**A**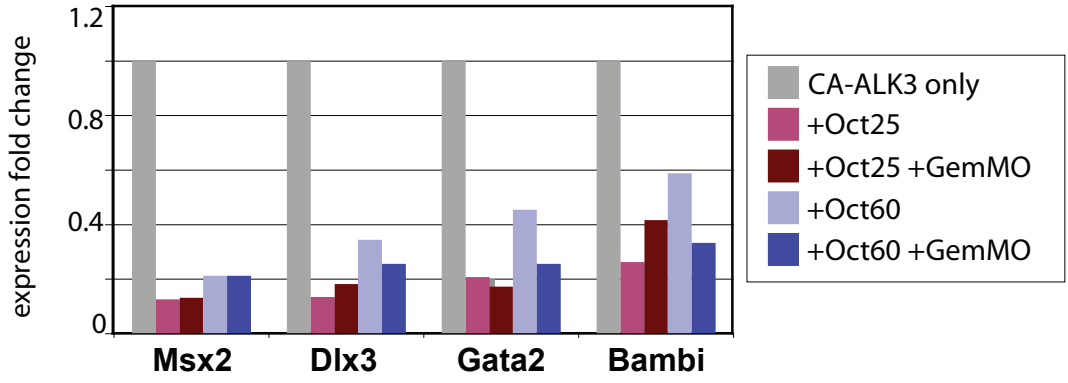**B**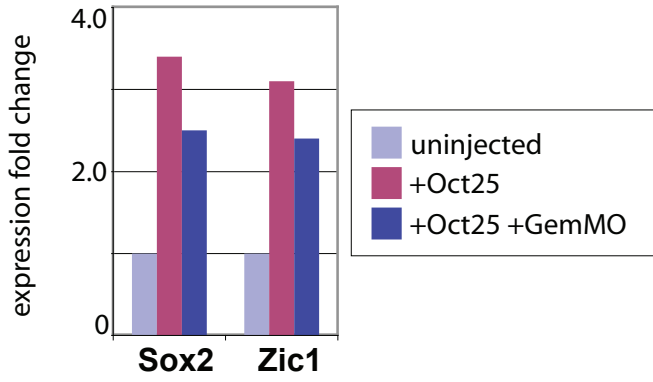**C**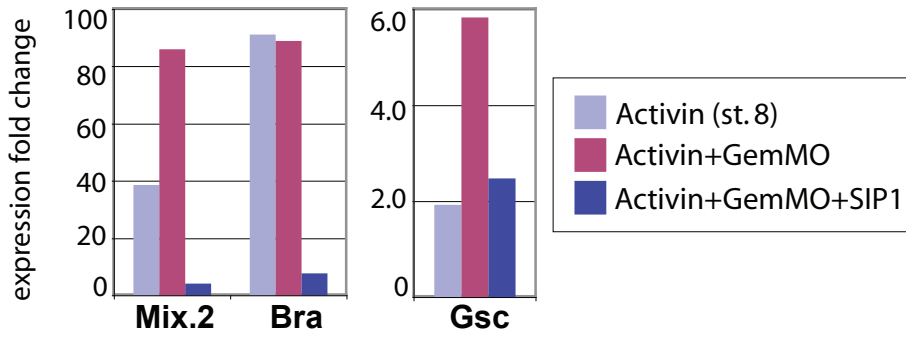**D**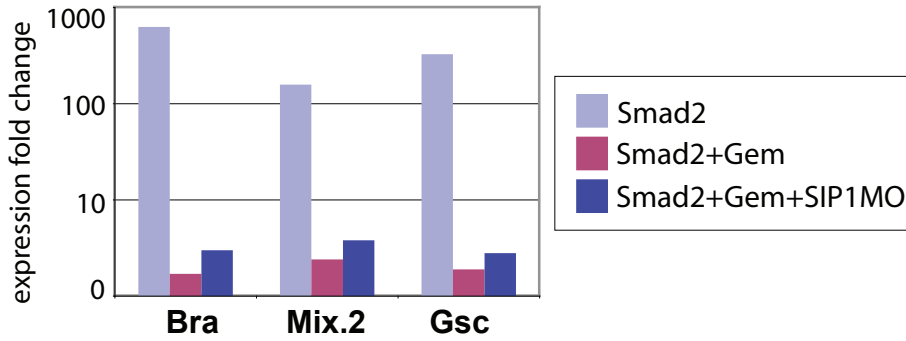**E**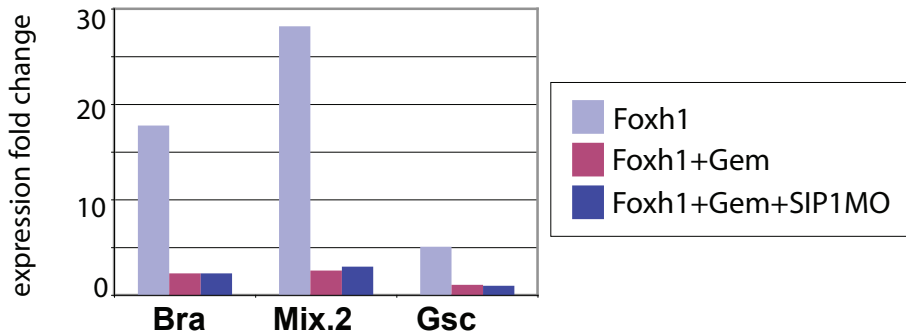

Supplement: dev059824figs8.pdf [file dev059824figs8.pdf]

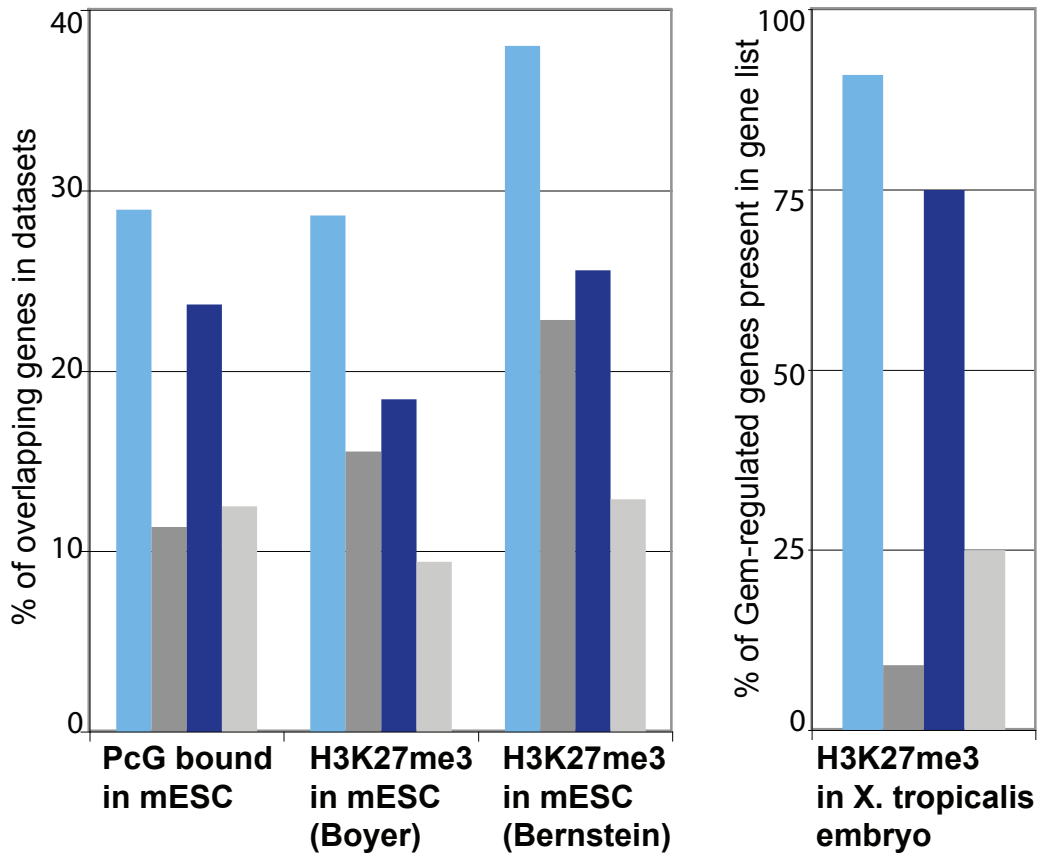

**% overlap of Gem-regulated and PcG bound or H3K27me3 modified genes:**

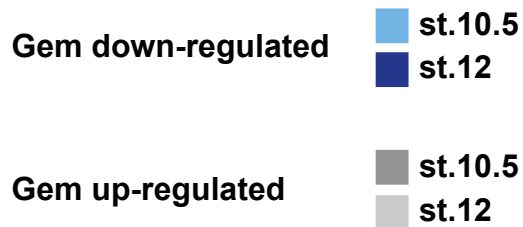

Supplement: dev059824figs9.pdf [file dev059824figs9.pdf]
